# Supplementary material for: Sinulariaone A: a novel diterpenoid with a 13-membered carbocyclic skeleton from an octocoral Sinularia species
Source: Royal Society of Chemistry journal article supplement (doi:10.1039/d3ra01589k), 2023-01-01
Supplement: d3ra01589k1.pdf [file d3ra01589k1.pdf]

## Supplementary Information

### TABLE OF CONTENTS

|                                                                                                                    |   |
|--------------------------------------------------------------------------------------------------------------------|---|
| <b>Figure S1.</b> HRESIMS spectrum of sinulariaone A ( <b>1</b> ). .....                                           | 2 |
| <b>Figure S2.</b> IR spectrum of sinulariaone A ( <b>1</b> ). .....                                                | 3 |
| <b>Figure S3.</b> <sup>1</sup> H-NMR spectrum (400 MHz, CDCl <sub>3</sub> ) of sinulariaone A ( <b>1</b> ). .....  | 3 |
| <b>Figure S4.</b> Expanded <sup>1</sup> H-NMR spectrum (0.90~3.50 ppm) of sinulariaone A ( <b>1</b> ). .....       | 4 |
| <b>Figure S5.</b> <sup>13</sup> C-NMR spectrum (100 MHz, CDCl <sub>3</sub> ) of sinulariaone A ( <b>1</b> ). ..... | 4 |
| <b>Figure S6.</b> DEPT spectrum of sinulariaone A ( <b>1</b> ). .....                                              | 5 |
| <b>Figure S7.</b> HSQC spectrum of sinulariaone A ( <b>1</b> ). .....                                              | 5 |
| <b>Figure S8.</b> <sup>1</sup> H- <sup>1</sup> H COSY spectrum of sinulariaone A ( <b>1</b> ). .....               | 6 |
| <b>Figure S9.</b> HMBC spectrum of sinulariaone A ( <b>1</b> ). .....                                              | 6 |
| <b>Figure S10.</b> Expanded HMBC spectrum of sinulariaone A ( <b>1</b> ). .....                                    | 7 |
| <b>Figure S11.</b> NOESY spectrum of sinulariaone A ( <b>1</b> ). .....                                            | 7 |

## Mass Spectrum SmartFormula Report

### Analysis Info

Analysis Name D:\1214\si4137.d  
Method tune\_wide\_pos\_20220422.m  
Sample Name Si-4-13-7  
Comment ESI Positive

12/19/2022 4:08:10 PM  
Operator: YU HSIAO-CHING  
Instrument: BRUKER micrOTOF-Q

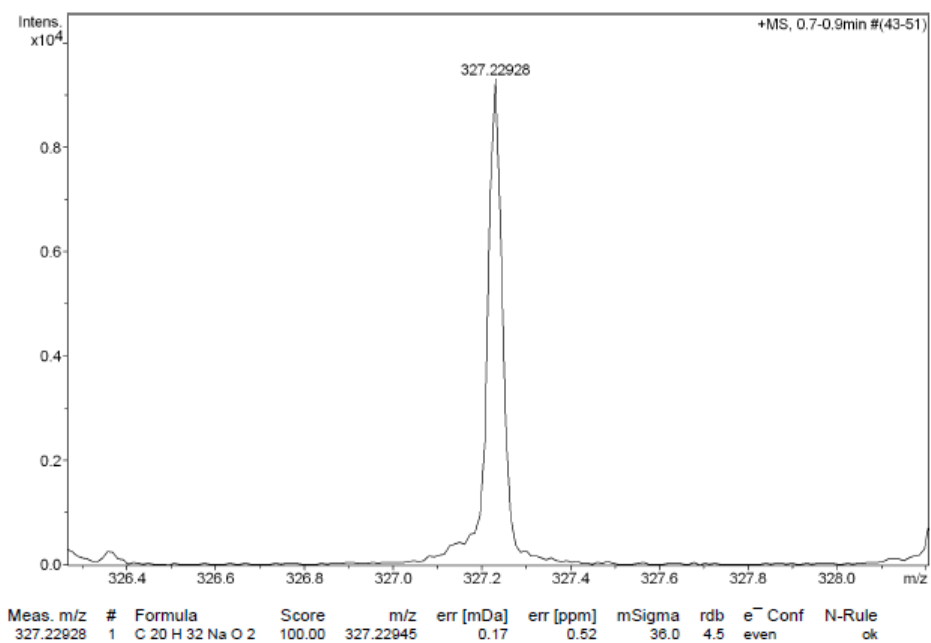

**Figure S1.** HRESIMS spectrum of sinulariaone A (1).

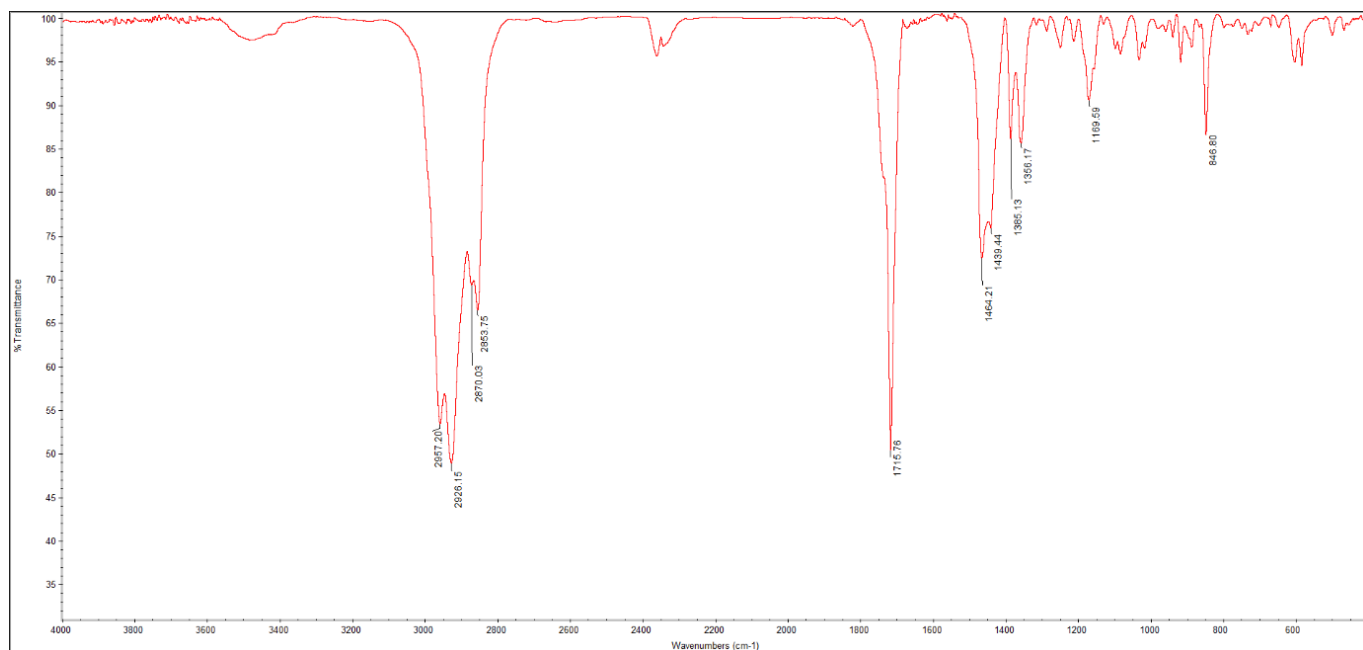

**Figure S2.** IR spectrum of sinulariaone A (1).

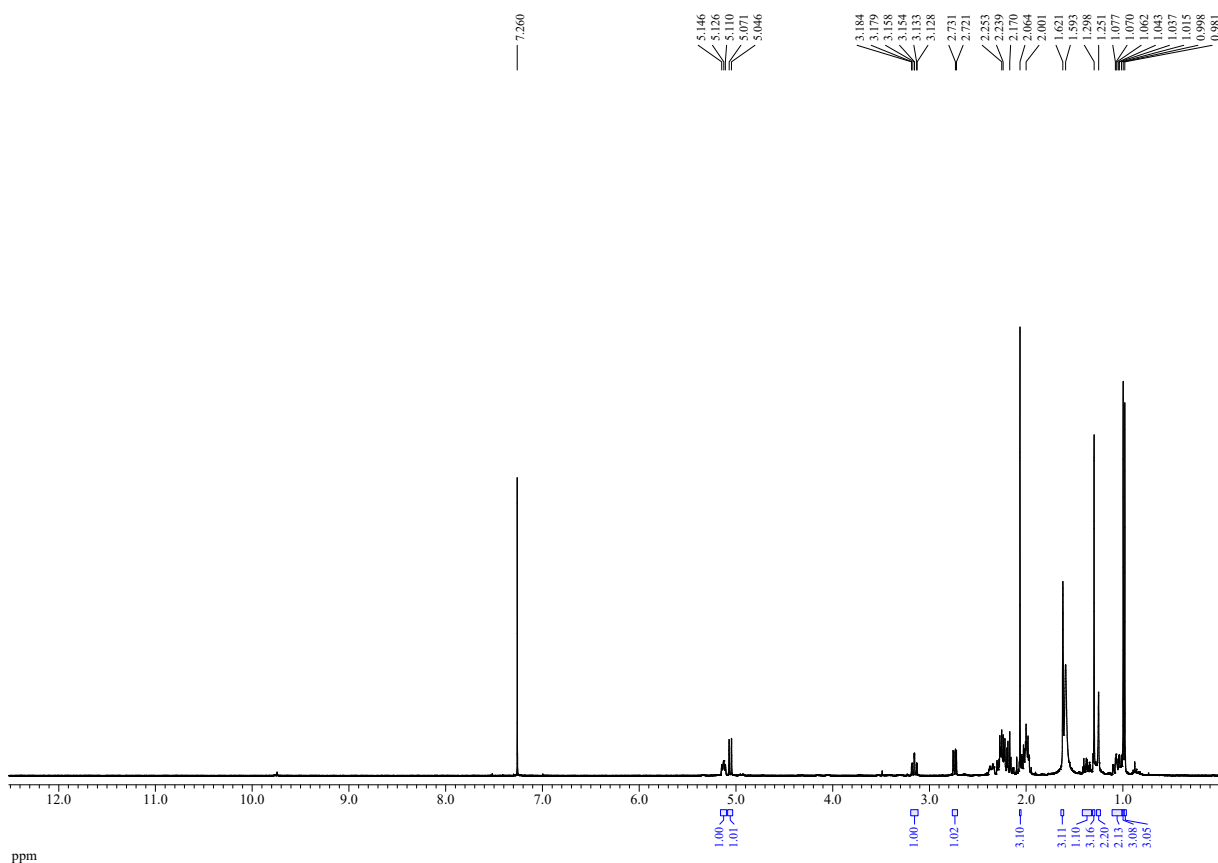

**Figure S3.** <sup>1</sup>H-NMR spectrum (400 MHz, CDCl<sub>3</sub>) of sinulariaone A (1).

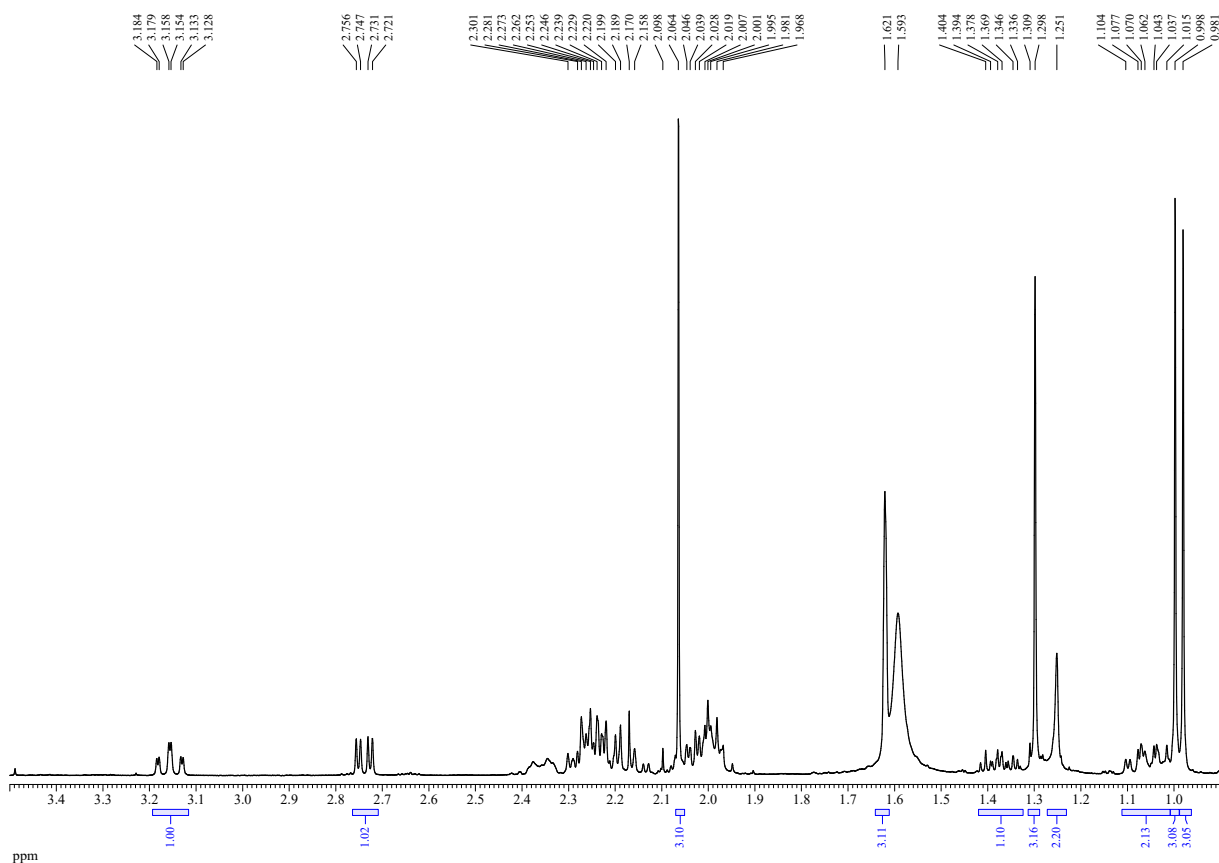

**Figure S4.** Expanded  $^1\text{H}$ -NMR spectrum (0.90~3.50 ppm) of sinulariaone A (**1**).

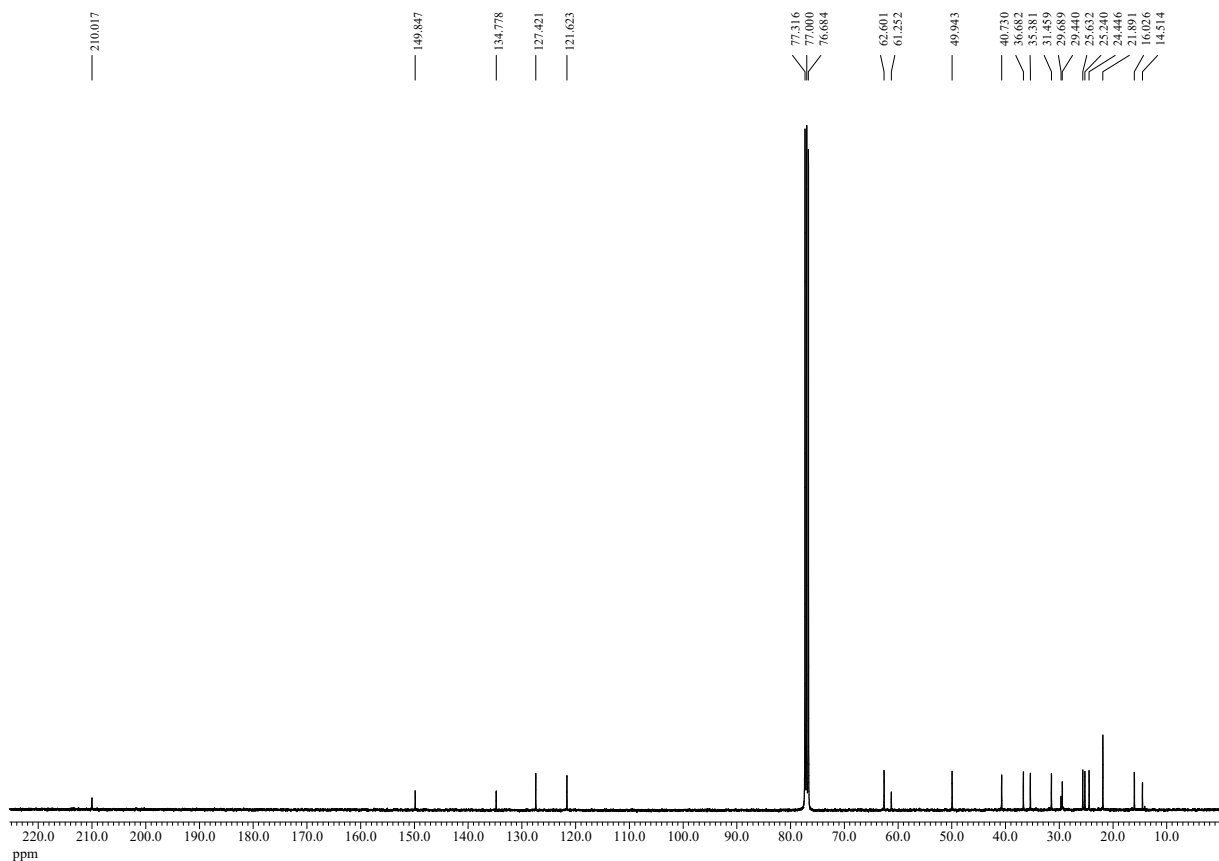

**Figure S5.**  $^{13}\text{C}$ -NMR spectrum (100 MHz,  $\text{CDCl}_3$ ) of sinulariaone A (**1**).

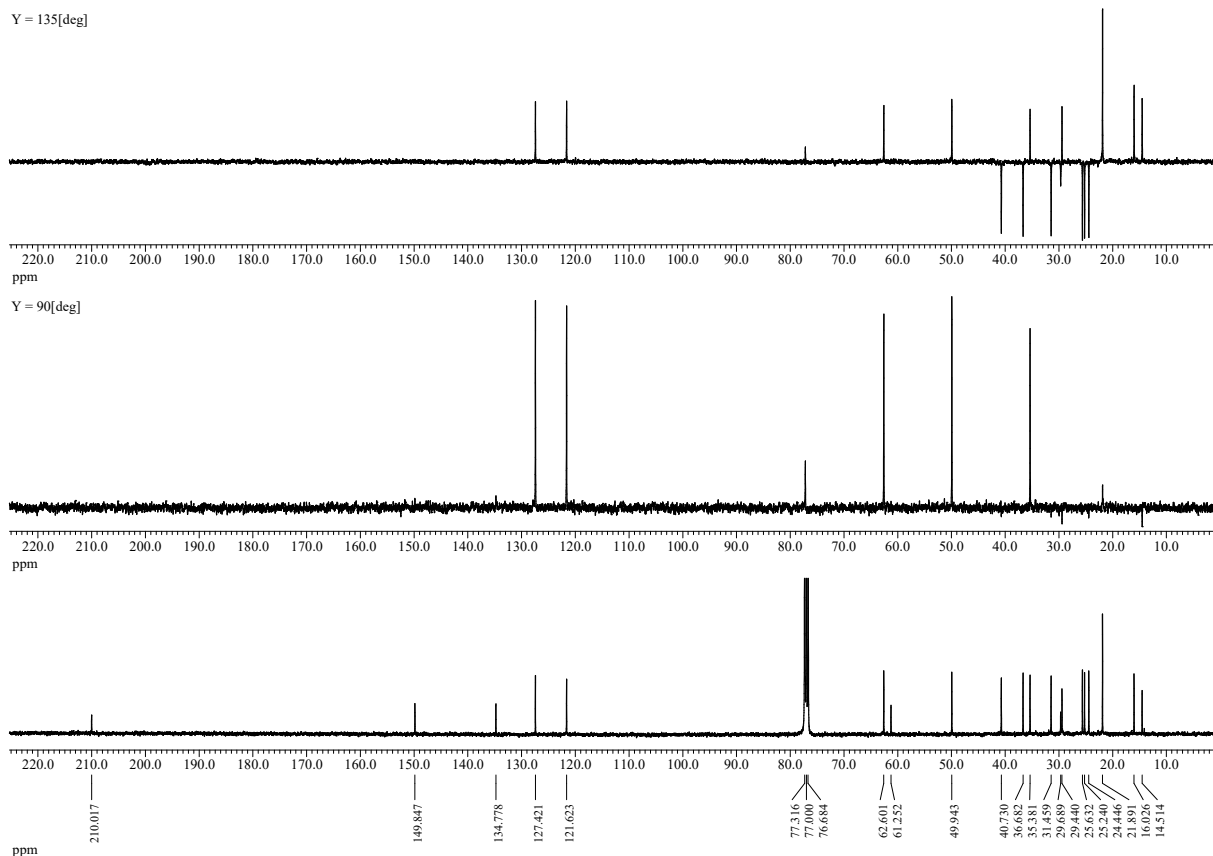

Figure S6. DEPT spectrum of sinulariaone A (1).

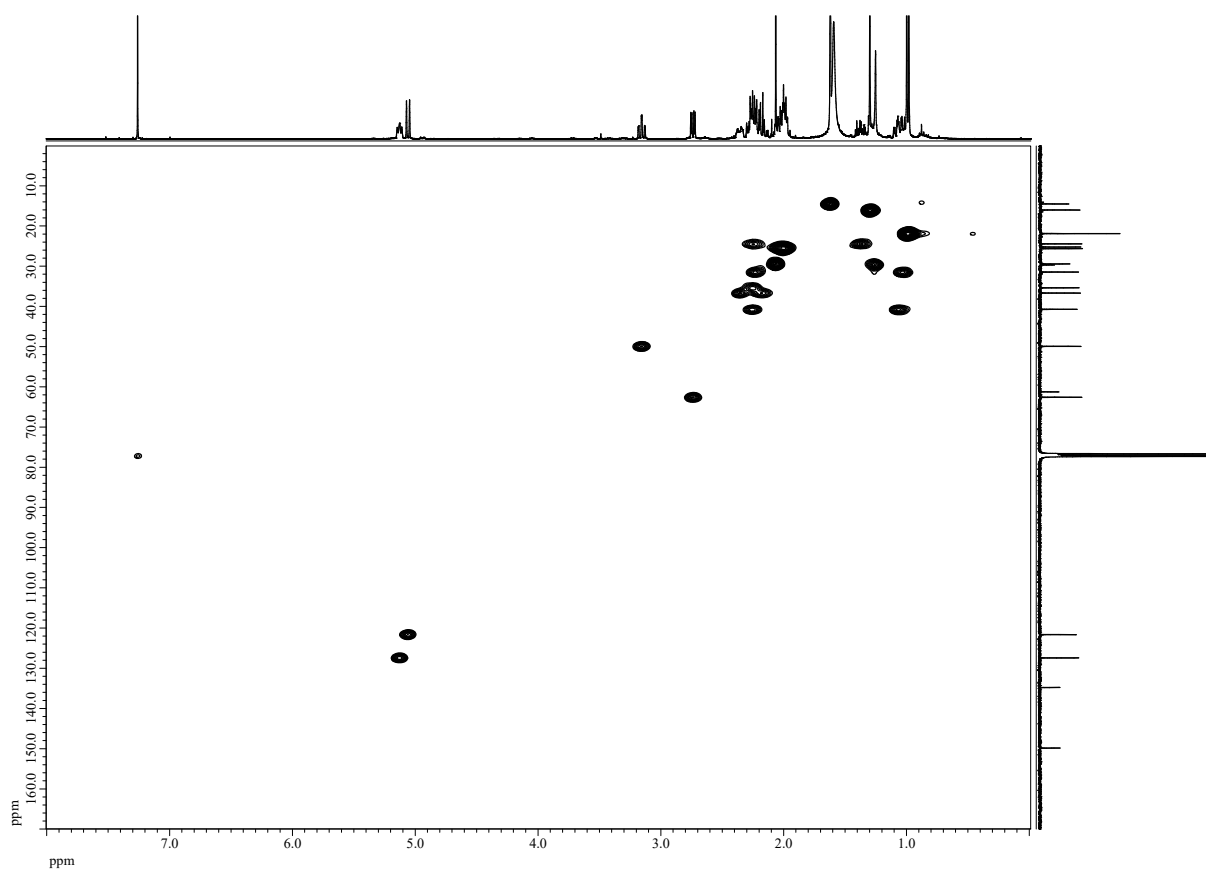

Figure S7. HSQC spectrum of sinulariaone A (1).

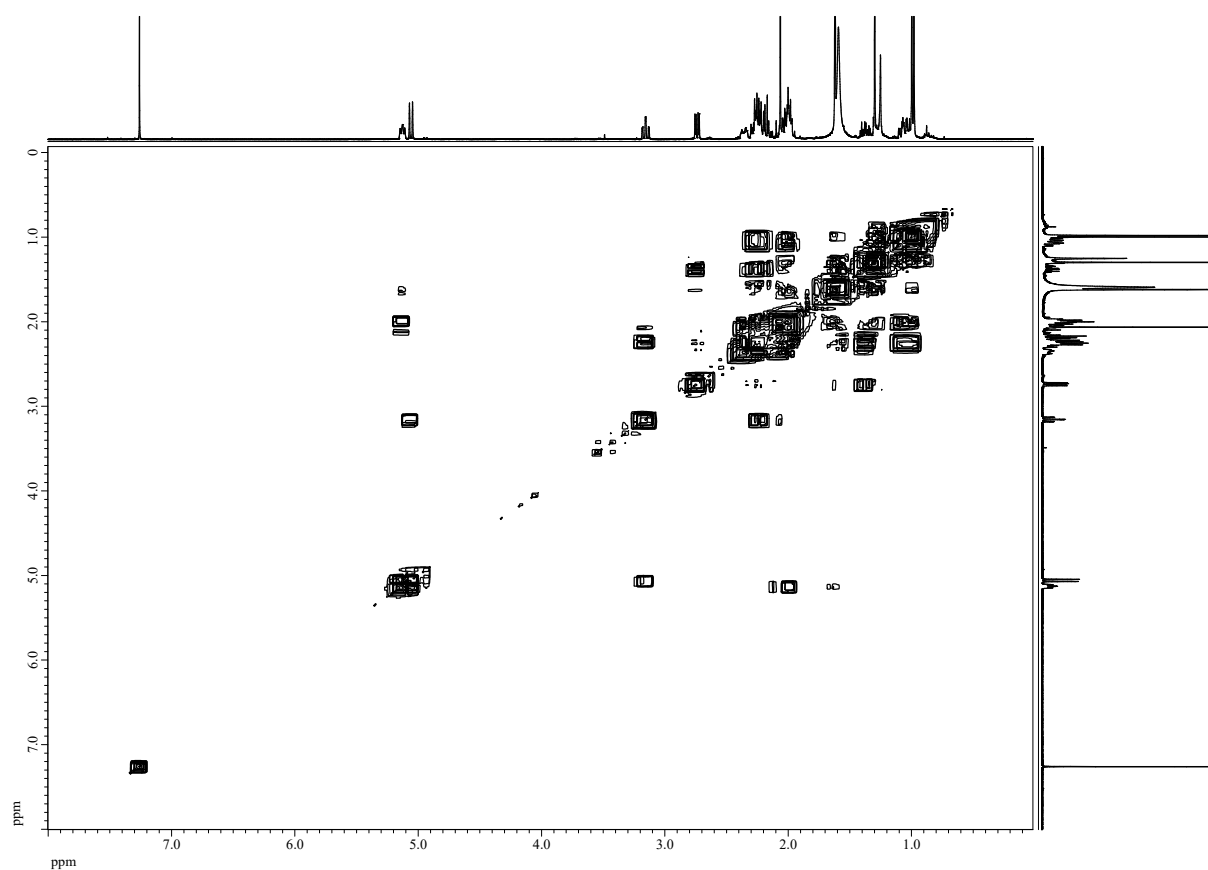

**Figure S8.**  $^1\text{H}$ - $^1\text{H}$  COSY spectrum of sinulariaone A (1).

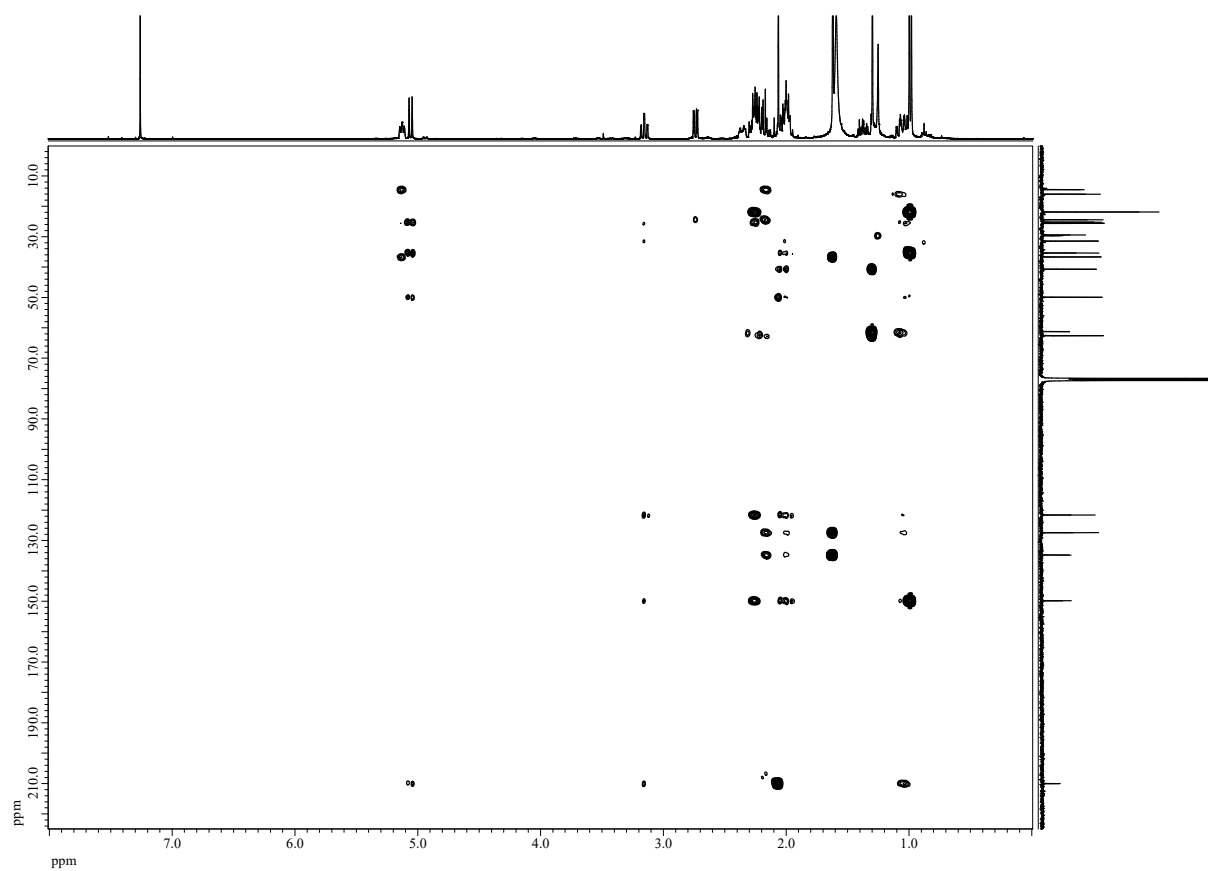

**Figure S9.** HMBC spectrum of sinulariaone A (1).

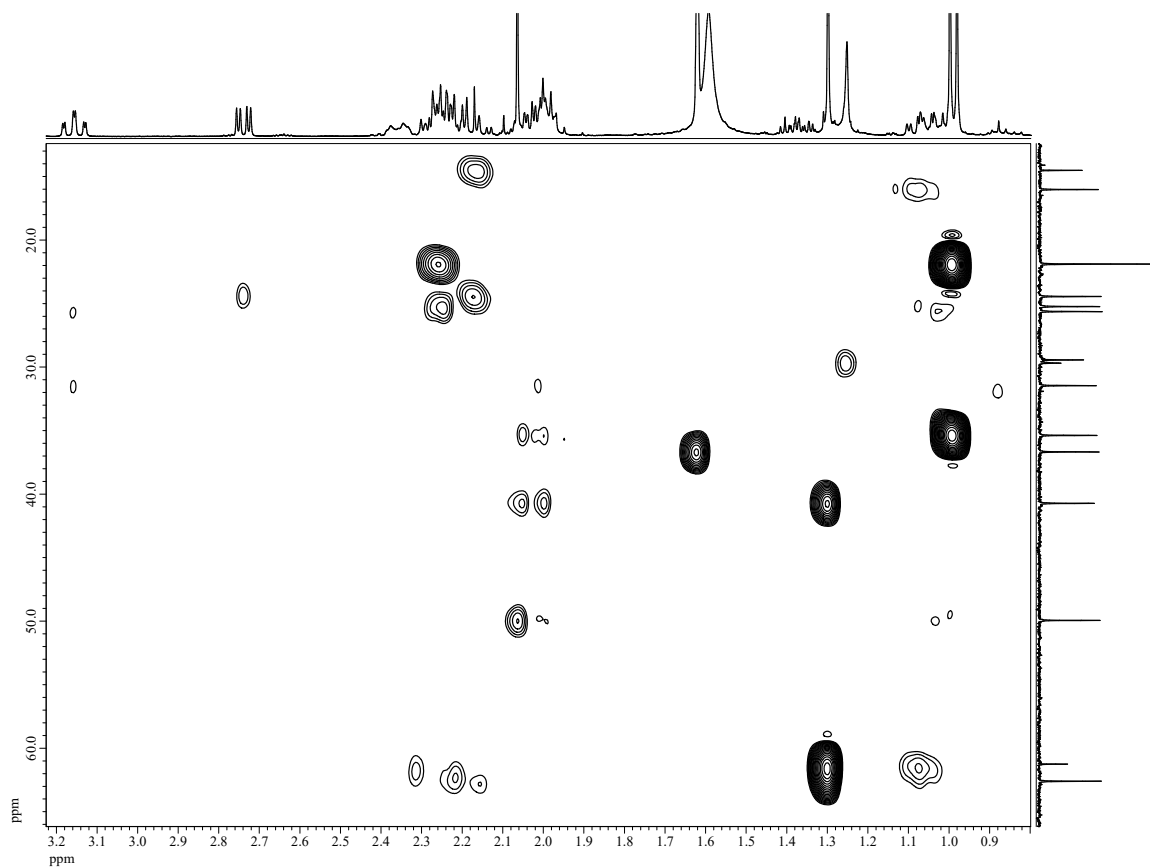

**Figure S10.** Expanded HMBC spectrum of sinulariaone A (1).

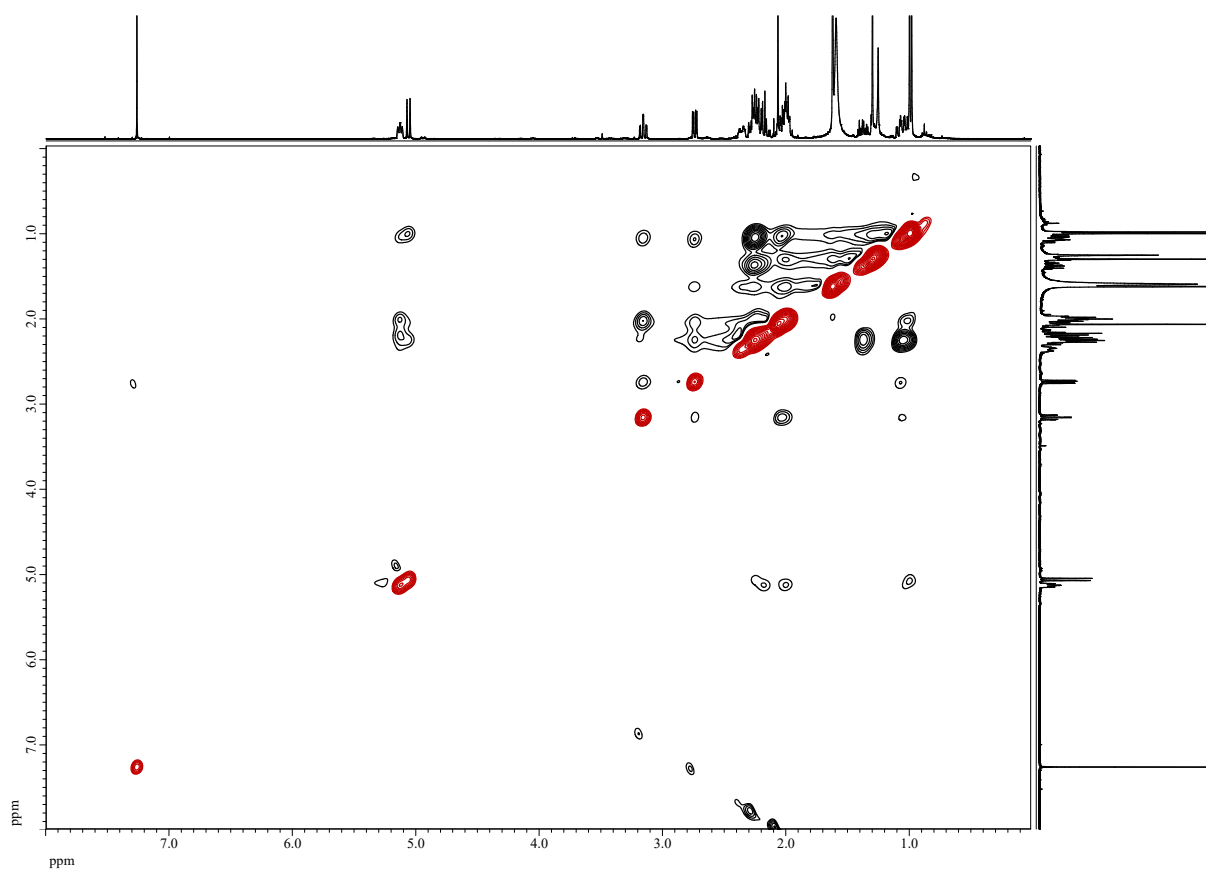

**Figure S11.** NOESY spectrum of sinulariaone A (1).
